Household-level social-ecological risk factors for dengue infection in Ecuador

1 Social-ecological factors and preventive actions decrease the risk of dengue infection at the  
2 household-level: results from a prospective dengue surveillance study in Machala, Ecuador

3  
4 Aileen Kenneson<sup>1</sup>, Efraín Beltrán-Ayala<sup>4</sup>, Mercy J. Borbor-Cordova<sup>5</sup>, Mark E. Polhemus<sup>1,2</sup>,  
5 Sadie J. Ryan<sup>1,9,10,11</sup>, Timothy P. Endy<sup>1,2,3</sup>, Anna M. Stewart-Ibarra<sup>1,2</sup>

6  
7 <sup>1</sup> Center for Global Health & Translational Sciences, SUNY Upstate Medical University,  
8 Syracuse, NY, USA

9 <sup>2</sup> Department of Medicine, SUNY Upstate Medical University, Syracuse, NY, USA

10 <sup>3</sup> Department of Microbiology & Immunology, SUNY Upstate Medical University, Syracuse,  
11 NY, USA

12 <sup>4</sup> Facultad de Medicina, Universidad Técnica de Machala, Machala, El Oro Province, Ecuador

13 <sup>5</sup> Facultad de Ingeniería Marítima, Ciencias Biológicas, Oceánicas y Recursos Naturales, Escuela  
14 Superior Politecnica del Litoral (ESPOL), Guayaquil, Ecuador

15 <sup>8</sup> Ministry of Health, Machala, El Oro, Ecuador

16 <sup>9</sup> Department of Geography, University of Florida, Gainesville, FL, USA

17 <sup>10</sup> Emerging Pathogens Institute, University of Florida, Gainesville, FL, USA

18 <sup>11</sup> College of Life Sciences, University of Kwazulu-Natal, Durban, South Africa

19

20 \*Corresponding author: Anna M. Stewart-Ibarra

21 Email: amstew01@gmail.com

22

## Household-level social-ecological risk factors for dengue infection in Ecuador

### 1 **ABSTRACT**

#### 2 **Background**

3 In Ecuador, dengue virus (DENV) infections transmitted by the *Aedes aegypti* mosquito are  
4 among the greatest public health concerns in urban coastal communities. Community- and  
5 household-level vector control is the principal means of controlling disease outbreaks. This study  
6 aimed to assess the impact of knowledge, attitudes, and practices (KAPs) and social-ecological  
7 factors on the presence or absence of DENV infections in the household..

#### 8 **Methods**

9 In 2014 and 2015, individuals with DENV infections from sentinel clinics were invited to  
10 participate in the study, as well as members of their household and members of four neighboring  
11 households located within 200 meters. We conducted diagnostic testing for DENV on all study  
12 participants; we surveyed heads of households (HOHs) regarding demographics, housing  
13 conditions and KAPs. We compared KAPs and social-ecological factors between households  
14 with (n=139) versus without (n=80) DENV infections, using bivariate analyses and multivariate  
15 logistic regression models with and without interactions.

#### 16 **Results**

17 Significant risk factors in multivariate models included proximity to abandoned properties,  
18 interruptions in piped water, and shaded patios ( $p<0.05$ ). Significant protective factors included  
19 use of mosquito bed nets, fumigation inside the home, piped water inside the home ( $p<0.05$ ). In  
20 bivariate analyses (but not multivariate modeling), DENV infections was positively associated  
21 with HOHs who were male, employed, and of younger age than households without infections  
22 ( $p<0.05$ ). DENV infections were not associated with knowledgeattitude, or reported barriers to  
23 prevention activities.

## Household-level social-ecological risk factors for dengue infection in Ecuador

### 1 **Discussion**

2 Specific actions that can be considered to decrease the risk of DENV infections in the household  
3 include targeting vector control in highly shaded properties, fumigating inside the home, and use  
4 of mosquito bed nets. Community-level interventions include clean-up of abandoned properties,  
5 daily trash pick-up, and reliable piped water inside houses. These findings can inform  
6 interventions to reduce the risk of other diseases transmitted by the *Ae. aegypti* mosquito, such as  
7 chikungunya and Zika fever.

8

### 9 **Author summary**

10 Dengue, chikungunya and Zika viruses are transmitted to people primarily by the *Aedes aegypti*  
11 mosquitoes in tropical and subtropical regions. Diseases transmitted by the *Ae. aegypti* mosquito  
12 are a growing public health concern. Mosquito control is the principal means of preventing and  
13 controlling disease outbreaks. In this study, we compared the characteristics of households with  
14 and without DENV infections in the city of Machala, Ecuador. We found that risk factors for  
15 DENV infection included proximity to abandoned properties, interruptions in the piped water  
16 supply, and a highly shaded patio. Protective factors included the use of mosquito bed nets,  
17 fumigation inside the home, and piped water inside the home. These findings can be used to  
18 inform targeted vector control interventions by the public health sector at the household and  
19 community levels.

20

21 **Keywords:** dengue infection, *Aedes aegypti*, vector-borne, prevention, KAP, Ecuador

22

## Household-level social-ecological risk factors for dengue infection in Ecuador

### 1 **INTRODUCTION:**

2           Dengue fever is a febrile illness caused by the *Flavivirus* dengue virus (DENV), of which  
3 there are four serotypes (DENV1-4) [1]. Infections may be asymptomatic, or have symptoms  
4 ranging from fever, rash, and joint pain to hemorrhage, shock and sometimes death. About 3.9  
5 billion people, in 128 countries, are at risk of exposure to DENV infections [2,3]. In coastal  
6 Ecuador, the focus of this study, DENV infections and other febrile diseases transmitted by the  
7 *Aedes aegypti* mosquito, are among the greatest public health concerns. Over a five-year period  
8 (2010 to 2014), 72,060 cases of dengue illness were reported in Ecuador, with the highest  
9 incidence of cases in coastal urban areas [4]

10           *Aedes aegypti* is a tropical mosquito that has adapted to live and breed in urban  
11 environments [5,6]. *Ae. aegypti* also transmit chikungunya and Zika viruses, which now co-  
12 circulate with DENV in populations in the tropics and subtropics [7,8]. The female mosquitoes  
13 oviposit in water-bearing containers, which become the habitat of juvenile mosquitoes, such as  
14 water storage drums, tires, discarded containers, and flower pots [9–12]. Community- and  
15 household-level vector control interventions remain the principal means of controlling *Ae.*  
16 *aegypti*-borne disease outbreaks [13,14]. Preventive practices include covering water storage  
17 containers, eliminating standing water, adding larvicides to water containers, and general clean-  
18 up of potential water receptacles [1,14]. Placing screens on windows to protect against the  
19 mosquito vector has also been shown to be effective in preventing dengue transmission [15].  
20 Indoor residential spraying in households has been shown to decrease the abundance of adult *Ae.*  
21 *aegypti* [16], and may decrease the risk of exposure to infected mosquitoes in households with  
22 DENV infections [17]. Novel vector control methods include lethal ovitraps [18], insect growth

## Household-level social-ecological risk factors for dengue infection in Ecuador

1 regulators (e.g., pyroproxyfen) [19], Wolbachia infections [20], and introduction of genetically-  
2 modified sterile mosquitoes into the population [21].

3 In Ecuador, the Ministry of Health (MOH) is the institution responsible for arbovirus and  
4 vector surveillance and control. Disease surveillance includes mandatory reporting of suspected  
5 (clinically diagnosed) and laboratory confirmed DENV cases. The vector control unit of the  
6 MOH is informed of new DENV cases from MOH clinics on average 8 days post diagnosis  
7 (range: 1 to 14 days) (*pers. comm.* T. Ordoñez). Focal vector control, including indoor residual  
8 spraying, is conducted in and around the households and neighboring households of people with  
9 DENV infections. Other regular vector control activities include a schedule of indoor residual  
10 spraying with deltamethrin and ultra-low volume with malathion fogging in high-risk urban  
11 communities at the beginning of the rainy season, and household visits by inspectors to treat  
12 water-bearing containers with an organophosphate larvicide (abate/temefos). Community  
13 cleanups occur before the rainy season to remove rubbish from household patios. Educational  
14 interventions for dengue prevention include television and radio campaigns, fliers, outreach to  
15 patients in MOH clinics, and community education meetings.

16 To improve the effectiveness of vector control and disease prevention interventions,  
17 public health practitioners require knowledge of local risk factors for dengue transmission. Early  
18 formative qualitative studies postulated that DENV infections were the result of underlying  
19 social structural inequities in urban areas, and they documented widespread misconceptions  
20 about dengue transmission and illness [22–24]. Similarly, in Ecuador, community members  
21 described dengue risk as the result of complex interactions among biophysical, political-  
22 institutional and community-household factors, such as climate conditions, low risk perception,  
23 economic barriers to prevention, lack of social cohesion, a lack of access to municipal services

## Household-level social-ecological risk factors for dengue infection in Ecuador

1 (e.g., piped water, sewerage, garbage collection), and failed coordination between municipal and  
2 public health authorities [25]. These and other studies indicated the need to frame dengue  
3 prevention in the context of broader social development goals through participatory multisectoral  
4 processes. Such efforts have proven to be complex (27) and require extensive community  
5 engagement (28).

6 To guide these interventions, studies were developed to assess dengue-related knowledge,  
7 attitudes, and practices (KAPs) and social-ecological risk factors. Dengue-related KAPs have  
8 been shown to be associated with the following demographic variables: sex, age, marital status,  
9 education, literacy, employment, occupation, income, ethnicity, and religion [26–37]. Other risk  
10 factors include frequent fogging of the neighborhood [38], adequate resources and assistance  
11 from public health staff [27], community support or governmental infrastructure to control  
12 neighboring and public spaces [39], and having a reputable source of information such as health  
13 personnel or head of the village [40]. In Ecuador, dengue risk was found to be associated with  
14 older female heads of household, access to piped water in the home, poor housing condition,  
15 household water storage, higher housing density, lack of knowledge, and low risk perception  
16 [41,42]. One of the limitations of KAP studies is that they often focus on preventative practices  
17 as the outcome of interest, rather than DENV infections. Other studies, such as those in Ecuador,  
18 utilize proxy variables for dengue risk (e.g., vector densities or MOH case reports), rather than  
19 DENV infections.

20 Active surveillance studies that detect symptomatic and subclinical DENV infections in  
21 the community provide a much more robust measure of DENV risk, especially when paired with  
22 direct observations of risk factors. Examples of enhanced surveillance studies that evaluated risk  
23 factors for DENV infections include a recent case-control study that was conducted in China

## Household-level social-ecological risk factors for dengue infection in Ecuador

1 [43], and seroprevalence studies that measured the presence of dengue antibodies (IgG,  
2 indicative of a past infection) in Malaysia, India, the Texas-Mexico border, Sudan, and Key  
3 West, Florida [44–49].

4 This study contributes to a growing body of knowledge on social-ecological and KAP  
5 risk factors for DENV infections. We detected acute and recent DENV infections through a  
6 passive and active surveillance study in Machala, Ecuador, in 2014 and 2015 [50]. We invited  
7 individuals with acute DENV infections (index cases) to participate in the study, along with  
8 other members of the index case household and members of four neighboring households located  
9 within 200 meters of the index house. We conducted diagnostic testing for DENV on all study  
10 participants, and we surveyed heads of households regarding household demographics, housing  
11 conditions, and dengue-related KAPs. Here, we present the results of analysis of the association  
12 between these risk factors and the presence or absence of DENV infections in households.

13

### 14 **METHODS:**

#### 15 **Ethics Statement:**

16 This protocol was reviewed and approved by Institutional Review Boards (IRBs) at  
17 SUNY Upstate Medical University, the Luis Vernaza Hospital in Guayaquil, Ecuador, and the  
18 Ecuadorean MOH. Prior to the start of the study, all participants engaged in a written informed  
19 consent or assent process, as applicable. In the event the participant was unable to participate in  
20 the informed consent or assent process, a recognized health-care proxy represented them in the  
21 process and documented consent. The study population included children (>6 months) to adults.

22

#### 23 **Study Site:**

## Household-level social-ecological risk factors for dengue infection in Ecuador

1           Machala, Ecuador (population of approx. 276,000) is the capital city of El Oro Province  
2           and is a major port in the coastal lowland region (Figure 1). It is located 70 kilometers north of  
3           the Peruvian border. Like many cities in Latin America, people in the urban periphery have  
4           inadequate access to infrastructure and services, such as piped water and garbage collection,  
5           increasing their risk of DENV infections [41,42]. In 2014 and 2015, 1006 and 2877 suspected  
6           and confirmed DENV cases, respectively, were reported by the MOH, resulting in an incidence  
7           of 36.4 and 104 DENV cases per 10,000 people in the city of Machala. In 2014 all four DENV  
8           serotypes co-circulated, and in 2015 DENV1 and DENV2 were detected, along with the first  
9           cases of chikungunya. It should be noted that a high proportion of the suspected DENV cases in  
10          2015 were misdiagnosed, and were actually chikungunya. Based on active surveillance in 2014  
11          and 2015 [50], the prevalence of DENV infections is greatest in children and young adults under  
12          the age of 20, who accounted for 51% of all acute or recent DENV infections. For every  
13          medically-attended case, there are approximately three additional unreported DENV infections in  
14          the community.

15

### 16   **Study design:**

17          We conducted diagnostic testing for dengue on all study participants, and we surveyed  
18          heads of households regarding household demographics, housing condition, and dengue  
19          prevention KAPs. The ascertainment and recruitment of households into this study is described  
20          in detail elsewhere [50]. Briefly, individuals who present with clinically-suspected dengue at  
21          one of five clinical sites operated by the MOH in Machala, Ecuador are invited to participate in  
22          this ongoing study. In this paper, we present an analysis that includes participants from January  
23          2014 through September 2015.



## Household-level social-ecological risk factors for dengue infection in Ecuador

1           After giving informed consent, the participants were tested for DENV infections using  
2 the dengue NS1 rapid strip test (PanBio). A random subset of dengue rapid test-positive  
3 individuals (up to four per week) was invited to participate in a household study, and these  
4 households are referred to herein as index households. In addition, individuals from the nearest  
5 four neighboring households (within 200 meters) in the four cardinal directions were invited to  
6 participate in the household study, and are referred to as associate households. A maximum of  
7 four individuals per household were invited to participate in the study. This study design was  
8 developed and optimized in dengue surveillance studies in Thailand [51,52].

9           The household study consisted of three parts: a survey of the head of the household,  
10 interviewer observation of household characteristics, and blood draw of each household member  
11 who was available and who consented for dengue testing. The survey was completed by the head  
12 of the household (self-identified), or a proxy (adult age 18 years or greater who was at home  
13 during the study team visit, usually the husband or wife) if not available. The survey included  
14 questions about the demographics of the head of the household, household demographics, access  
15 to water and sewage services, water storage and use practices, knowledge and attitudes about  
16 dengue, and prevention activities employed by members of the household. The interviewers'  
17 observations included condition of the house and patio, construction materials, presence and  
18 condition of screens in windows and doors, and presence of uncovered standing water on the  
19 property. The survey instrument was originally developed in a study that we conducted on  
20 household risk factors associated with *Ae. aegypti* [41], and was modified to address risk factors  
21 that emerged in a qualitative study of community perceptions [25]. Both of these prior studies  
22 were conducted in Machala in 2010-2011. The instrument was developed in Spanish, and the  
23 current version was field tested by the study team in households in Machala prior to the start of

## Household-level social-ecological risk factors for dengue infection in Ecuador

1 the study. The survey instrument has been provided in English (Supplementary Text 1) and  
2 Spanish (Supplementary Text 2)

3 Blood samples from study participants were tested for DENV using RT-PCR, NS1 rapid  
4 strip test, and PanBio commercial ELISA assays for NS1 and IgM assays. See Stewart Ibarra,  
5 2017, for details of the diagnostic testing procedures [50]. A participant was categorized as  
6 having an acute or recent DENV infection if he or she tested positive for any of these tests.

7 Households were characterized as having a DENV infection present if anyone in the household  
8 tested positive for DENV. All index households, by definition, had DENV infections present.

9

### 10 **Statistical analysis:**

11 Statistical analyses were conducted using SAS version 9.4. Bivariate analyses of  
12 households with versus without acute or recent DENV infections were conducted using Chi-  
13 square, Fisher's Exact, or t-tests. Multivariate logistic regression was conducted in two steps  
14 using the proc logistic command with backward selection. In the first step, all potential main  
15 effects were included in the analysis. In the second step, two-way interactions between all of the  
16 variables identified in the first step were added to the analysis.

17

### 18 **RESULTS:**

19 We conducted a household-level study to identify KAP and social-ecological risk factors  
20 associated with acute or recent DENV infections in the city of Machala, Ecuador. From January  
21 2014 through September 2015, 72 cases of acute DENV infections (NS1 positive) were  
22 identified in our surveillance system. A random subset of 44 of these cases (44/72, 61%), along  
23 with four neighboring households, were selected to participate in this investigation. Thus, a total

## Household-level social-ecological risk factors for dengue infection in Ecuador

1 of 219 households were included in the household study: 44 index households and 175 associate  
2 households (Figure 1). These households were distributed across the city of Machala, thereby  
3 representing a range of social-ecological conditions. Most of the households (n=161) were  
4 recruited during 2014, and the rest (n=58) were from 2015. The head of the household was  
5 female in 24.2% of households, and had a mean age of 47.8 (SD=13.6) years. The households  
6 were classified as having (n=139) or not having (n=80) a member with an acute or recent DENV  
7 infection. Approximately one third of the households with DENV infections (44/139) were index  
8 households.

9 All of the index households, by definition, had at least one individual who tested positive  
10 for DENV. The number of individuals with DENV infections per index household ranged from  
11 one to four (mean=1.6). This accounted for 64% of household members with DENV infections  
12 on average (range 25-100%). Among the associate households, a range of zero to four  
13 (mean=0.58) individuals per household had DENV infections, accounting for a mean of 30% of  
14 household members (range 0-100%).

15 We compared the social-ecological characteristics and reported barriers to dengue  
16 prevention in households with versus without DENV infections (Table 1). In bivariate analyses,  
17 the presence of DENV infections was positively associated with heads of households who were  
18 male, employed, and of younger age than households without dengue ( $p<0.05$ ). Households with  
19 DENV infections were more likely to have a patio with more than 50% shade or to have adjacent  
20 abandoned property, and were less likely to have piped water inside of the house or have their  
21 trash picked up daily ( $p<0.05$ ).

22 We also compared KAPs in households with versus without DENV infections (Table 2).  
23 The households with versus without DENV infections did not differ on any of the five

## Household-level social-ecological risk factors for dengue infection in Ecuador

1 knowledge and attitude questions, or on reported barriers to dengue prevention activities. We  
2 asked survey respondents about whether they engaged in twelve different preventive activities.  
3 The most commonly-reported dengue prevention activities were eliminating standing water  
4 (37.9%), covering water containers (37.9%), fumigating inside the house (37.9%), cleaning the  
5 garbage (37.0%), applying chemicals to standing water (i.e., larvicides) (25.6%) and using  
6 mosquito bed nets (20.6%). Households with DENV infections were more likely to report that  
7 they applied chemicals to standing water, and were less likely to report the use of indoor  
8 fumigation (Table 2). The other prevention activities did not differ between households with  
9 versus without DENV infections.

10 All social-ecological factors and KAPs were used in a logistic regression analysis to  
11 identify a multivariate model to predict the presence of an acute or recent DENV infection in the  
12 household (Table 3). Model 1 included main effects only, and demonstrated that abandoned  
13 properties nearby, frequent interruptions in water supply, and patios with >50% shade were risk  
14 factors for dengue. Protective factors in this model included piped water inside the house,  
15 fumigation inside the house, use of mosquito bed nets, and reporting cost of as a barrier to  
16 protective practices. The strongest factor in this model was the presence of >50% shade on the  
17 patio, with an adjusted odds ratio (adj. OR) of 16.2 (95%CI: 2.98-88.1, p=0.001).

18 We then added all two-way interactions of these variables to the model, and eliminated  
19 non-significant factors and in a backward selection process. In Model 2, the presence of a patio  
20 with more than 50% shade was highly predictive of DENV infections in the household, with an  
21 adj. OR of 13.3 (95%CI: 3.2-54.3, p=0.0003), compared to households without a patio or with a  
22 patio that had <50% in the shade. Use of mosquito bed nets was protective against DENV  
23 infections in this model (adj. OR=0.39. 95%CI: 0.18-0.85, p=0.02). There were two significant

## Household-level social-ecological risk factors for dengue infection in Ecuador

1 interaction terms in Model 2. First, fumigation in the house was protective against DENV  
2 infections when there were no abandoned houses nearby (adj. OR=0.19, 95% CI: 0.09-0.42,  
3  $p<0.0001$ ) but not when there was one or more abandoned properties nearby. Second,  
4 fumigation was protective when there was piped water inside the house (adj. OR=0.19, 95% CI:  
5 0.09-0.39,  $p<0.0001$ ) but not when there was no piped water in the house.

6

### 7 **DISCUSSION:**

8 In this study, we found that specific social-ecological factors and preventive actions were  
9 associated with effective dengue control in an region with a high burden of disease, providing  
10 important information to guide public health interventions. The strongest predictor of DENV  
11 infections in the household, in both multivariate models, was having a patio that was more than  
12 50% shaded. Patio shade and patio condition have been shown to be associated with the  
13 presence of *Ae. aegypti* mosquitoes in prior studies, including studies in Machala [41,53]. Our  
14 results also support the use of mosquito bed nets, as people who did not report the use of  
15 mosquito bed nets were about twice as likely to live in a household that had an acute or recent  
16 dengue infection. Other studies have shown associations among dengue infections, KAPs and  
17 demographic factors. In our study, with DENV infection as the primary endpoint, demographic  
18 variables are not significant factors in the multivariate model. Likewise, knowledge and attitude  
19 responses were not associated with DENV infections in the household.

20 Abandoned properties nearby and lack of piped water inside the house were significant  
21 predictors of DENV infections in the house when only main effects were included in Model 1,  
22 but not in Model 2. Likewise, fumigation inside the home was found to be protective against  
23 DENV infections in Model 1, but only in conjunction with other factors in Model 2. The

## Household-level social-ecological risk factors for dengue infection in Ecuador

1 statistical interactions suggest that the risk factors of abandoned properties and lack of piped  
2 water inside the house cannot be overcome with fumigation inside the home. That is, fumigation  
3 inside the home is only effective in the absence of abandoned properties nearby and the presence  
4 of piped water inside the house. Prior studies in Peru [16] and Australia [17] demonstrated the  
5 impacts of indoor residual spraying on a reduction in *Ae. aegypti* densities and dengue risk. In a  
6 recent review of indoor residual spraying (IRS) and indoor space spraying (ISS), the authors  
7 found that there is evidence of a reduction in *Ae. aegypti* densities, but there is limited evidence  
8 of the effects on DENV infections [54]. In our study, 37.9% of participants reported fumigation  
9 inside the house as a preventive action, but we did not distinguish between fumigation by the  
10 MOH versus by the household members themselves. Many people in Ecuador fumigate their  
11 own homes, and there are a variety of products available on the market [55]. It should be noted  
12 that a high degree of insecticide resistance in *Ae. aegypti* has been reported in this region (A.  
13 Stewart, *pers. comm.*). Resistance is a major public health concern, since insecticides are one of  
14 the primary means of controlling *Ae. aegypti* transmitted diseases [56]. Studies are ongoing to  
15 document the prevalence of resistance to specific groups of insecticides, to inform vector control  
16 interventions.

17 In this study, 20.6% of households reported the use of mosquito bed nets, and use of nets  
18 was associated with a 2.6-fold decreased risk of DENV infections in the household. The  
19 protective role of bed nets against DENV infections has been debated in the literature. Studies  
20 from rural Thailand reported results similar to this study [57]. Insecticide-treated bed nets offer  
21 protection both as a physical barrier during daytime sleeping, and by killing *Ae. aegypti* that  
22 come into contact with them, as shown in trials in Haiti [58]. Other studies have failed to find an  
23 association between mosquito net use and DENV infections [59,60], presumably because *Ae.*

## Household-level social-ecological risk factors for dengue infection in Ecuador

1 *aegypti* feeds during the day (morning and afternoon) [61]. However, bed nets are recommended  
2 for children napping during the day and to prevent further spread of the virus by viremic  
3 individuals resting at home under nets during the day [60,62]. We did not distinguish between  
4 insecticide-treated and untreated mosquito bed nets, nor did we gather information on the use of  
5 nets (i.e., hours per day, time of day). Based on our local experience, a high proportion of  
6 families in the urban periphery use untreated bed nets to protect against nuisance mosquitoes in  
7 the early evening and at night. There is a high level of acceptability of the use of bed nets by  
8 community members as a result of intensive malaria prevention campaigns in the 2000s. Dengue  
9 prevention campaigns in Machala in recent years have not focused on the use of bed nets.  
10 However, during the recent epidemic of Zika fever, the MOH targeted the distribution of bed  
11 nets in coastal Ecuador to pregnant women. Further research is needed to elucidate the  
12 association between mosquito bed nets and DENV protection observed in this study.

13         There were two additional social-ecological factors that were significant in bivariate  
14 analyses but not multivariate model: daily trash pick-up, and application of chemicals to standing  
15 water. Applying chemicals to standing water positively correlated with having DENV infections  
16 in the household, probably because those who responded “yes” had standing water to begin with.  
17 In our experience, chemical application refers to the use of granular organophosphate larvicides  
18 (temefos/abate) provided by the MOH and the use of bleach by households to purify the water.  
19 Daily trash pick-up appears to be protective against DENV infections in the household, and  
20 could be considered by communities as part of dengue prevention programs, even though it was  
21 not included in the multivariate model.

22         In contrast to previous studies in Ecuador, we found that piped water in the house was  
23 protective against dengue. Prior entomological field studies and neighborhood-level geospatial

## Household-level social-ecological risk factors for dengue infection in Ecuador

1 analyses of MOH dengue cases in Machala found that access to piped water and poor housing  
2 conditions interacted to increase dengue risk [41,42]. When these studies were conducted in  
3 2010-2011, we observed that households that had recently received piped water continued to  
4 store water due to poor quality of access and established water storage behaviors. A number of  
5 factors could contribute to different findings in the current study. First, the prior studies utilized  
6 MOH dengue cases and vector indices as a proxy for DENV risk, which may have introduced  
7 biases. Second, it is possible that the quality of piped water (e.g., frequency of interruptions,  
8 sediment in the water) improved from 2010 to 2015 due to the major urban renovation projects  
9 that occurred during that time. Qualitative improvements in piped water access would reduce the  
10 need to store water, thus increasing the protective role of piped water. Third, community  
11 members may have changed their water storage behaviors in response to MOH education or  
12 other factors.

13 We also found that DENV infections in the household were associated with younger,  
14 male heads of households who were employed outside of the home (in the bivariate analyses).  
15 This is in contrast to prior geospatial analyses of MOH dengue cases, which found that  
16 neighborhoods with a higher proportion of older, female heads of household were at greater risk  
17 [42]. The active surveillance methods in the current study allowed us to more accurately  
18 characterize the burden of disease by identifying asymptomatic cases of DENV infection and  
19 individuals with DENV infection who had not sought medical care, which were not accounted  
20 for in previous studies. Demographic differences between symptomatic and asymptomatic cases  
21 may have introduced bias in earlier studies. In Machala, community members reported that  
22 working men in the urban periphery are the group least likely to seek healthcare [25], and health  
23 care providers [63] supported this notion; therefore, prior studies based on MOH case reports



## Household-level social-ecological risk factors for dengue infection in Ecuador

1 would have underestimated their risk of infection. Also, this study focused on data from  
2 individual households rather than neighborhood-level data, and may have therefore been better  
3 suited to tease out factors related to the spread of DENV between households. The differences  
4 between this study and prior studies highlight the complex nature of DENV transmission and  
5 vector control programs.

6         The results of this study contribute to a growing body of knowledge on the role of social-  
7 ecological factors and KAPs on the prevalence of DENV infection. Risk factors vary by location  
8 and over time, highlighting the importance of local studies to understand disease risk factors and  
9 to inform localized interventions. In a recent case-control study in China, Chen and colleagues  
10 showed that living in old apartment buildings increased the risk of DENV infection, while  
11 knowledge of dengue fever, use of repellent, and cleaning trash/water containers decreased the  
12 risk of DENV infections [43]. In studies from Cameroon, India, the Texas-Mexico border,  
13 Sudan, and Key West, Florida, USA, the presence of DENV antibodies (IgG, indicative of a past  
14 infection) in individuals was associated with lack of knowledge about dengue fever, high  
15 household density (more than three people per bedroom), more than two children in the home,  
16 water storage, lack of air conditioning, and poor housing conditions [45–49]. In a Malaysian  
17 study, the seroprevalence of DENV IgG in school children was positively associated with  
18 apartment/condominium homes and households in a rural setting, while neighborhood fogging,  
19 preventive actions and knowledge were associated with the absence of seropositivity in the  
20 community's school children [44]. In a community-level study in Singapore, investigators  
21 compared the attributes of communities that were and were not transmission dengue hotspots  
22 [64]. They found that protection factors included male heads of households, higher education,  
23 having landed property, knowledge of preventive practices, and practicing certain preventive

## Household-level social-ecological risk factors for dengue infection in Ecuador

1 activities (changing water in vases or bowls on alternate days, and removing water from flower  
2 pot plates on alternate days).

3         The main strength of this study is that through a combined passive and active surveillance  
4 study design, we focused on laboratory-confirmed acute and recent DENV infections as the  
5 primary endpoint. Many prior KAP studies focused on the use of preventive activities, MOH  
6 case reports, or vector densities as proxies for dengue risk. We were thus able to include capture  
7 and classify asymptomatic infections, as well as symptomatic infections that were not reported to  
8 the MOH due to demographic differences in healthcare seeking behavior, factors which may  
9 have introduced bias into other studies. In addition, we made use of direct observation in order  
10 to capture characteristics of the houses, which eliminates possible errors introduced by self-  
11 report. We were also able to triangulate findings from this study to findings from prior  
12 qualitative and quantitative studies of dengue risk factors from the same city, allowing us to  
13 highlight differences and similarities across the studies.

14         The main limitation to this study is that we have no way of knowing where the  
15 individuals were infected with DENV. In addition to the home, individuals could also have been  
16 exposed at other locations such as school or work, and we do not account for risk factors at these  
17 locations. In the bivariate analyses, employment by the head of the household was a risk factor  
18 for DENV infections in the household, suggesting that exposure at work may be an important  
19 factor. A second limitation is that most of the DENV-positive households in this study were  
20 index cases, all of whom were referred through MOH health care facilities. Bias related to health  
21 care-seeking behavior may have been introduced as a result. Ideally, the analysis would include  
22 only associate households, but the sample size would have been too small for statistical analysis.  
23 We chose to include all households in the analysis in order to maximize the power of our

## Household-level social-ecological risk factors for dengue infection in Ecuador

1 analysis. A third limitation is that it is not possible to rule out the possibility that members of  
2 households with acute or recent DENV infections have recently changed their behavior or risk  
3 perception in response to the DENV infection. Biases could have been introduced by self-report  
4 or proxy report [65], although as noted earlier, some of the important variables in this study (e.g.,  
5 shading of patio) were obtained by research staff observation.

6 Our results suggest that specific actions at the household and community levels could  
7 reduce the spread of DENV infections. In resource-limited communities such as Machala, public  
8 health actions by the MOH could focus vector control interventions in high-risk households and  
9 communities. Tun-Lin and colleagues have shown that targeted interventions based on either  
10 types of water containers [66] or conditions of the household [67] can be at least as effective as  
11 non-targeted interventions. As in those studies, we found that homes next to abandoned  
12 properties and homes with heavily-shaded patios should be high-priority homes for interventions.  
13 However, we did not find any specific container type to be associated with DENV infections in  
14 the household.

15 KAP studies have several limitations, such as cultural influences on validity of results  
16 [65], and the inability of this tool to capture the complexity of underlying social-political  
17 structural drivers that influence DENV infections [68,69]. Factors beyond the individual and  
18 community levels play important roles in determining the efficacy of vector control programs  
19 [70]. For this reason, the results from KAP studies should be triangulated with data from more  
20 comprehensive qualitative approaches in order to understand how and why local risk factors  
21 affect disease transmission.

22 Based on our findings, we suggest that future studies, such as randomized trials, should  
23 investigate the impact of the following interventions on acute/recent DENV infections: targeting

## Household-level social-ecological risk factors for dengue infection in Ecuador

1 of vector control in highly-shaded properties, fumigating inside the home, and the use of  
2 mosquito bed nets. Community-level interventions include clean-up of abandoned properties,  
3 daily trash pick-up, and reliable piped water inside houses. Our results suggest that these  
4 community actions moderate the effectiveness of fumigation in prevention of DENV infection,  
5 and thus represent very important components of a community-based approach to prevention.  
6 These interventions will require strong inter-institutional collaborations across community  
7 leadership councils (responsible for social mobilization), municipal government (responsible for  
8 garbage collection, piped water, and abandoned properties), and the MOH (responsible for bed  
9 net distribution, fumigation, and other vector control) [25,71]. Our findings also highlight the  
10 importance of framing dengue prevention interventions in the context of broader urban  
11 development goals (e.g., improve access to piped water), which prior studies showed to be of  
12 greater interest to community members [25]. These community- and household-level  
13 interventions should also provide some protection against other *Ae. aegypti*-borne diseases such  
14 as chikungunya and Zika fever.

15

### 16 **Acknowledgements**

17 This project was possible thanks to support from colleagues from the Ministry of Health, the  
18 National Secretary of Higher Education, Science, Technology, and Innovation (SENESCYT) of  
19 Ecuador and community members from Machala, Ecuador. We thank our local field team and  
20 collaborators for their dedication and perseverance: Jefferson Adrian, Victor Arteaga, Jose  
21 Cueva, Reagan Deming, Carlos Enriquez, Prissila Fernandez, Froilan Heras, Naveed Heydari,  
22 Jesse Krisher, Lyndsay Krisher, Elizabeth McMahon, Eunice Ordoñez, Tania Ordoñez, and  
23 Mercy Silva. Thank you to Clinical Research Management (CRM) for supporting continued

## Household-level social-ecological risk factors for dengue infection in Ecuador

- 1 surveillance activities. Map data copyrighted OpenStreetMap contributors and available from
- 2 <https://www.openstreetmap.org>
- 3

## Household-level social-ecological risk factors for dengue infection in Ecuador

### 1 **References:**

- 2 1. Dengue: guidelines for diagnosis, treatment, prevention and control. World Health Organization;  
3 Geneva. 2009.
- 4 2. Jentes ES, Lash RR, Johansson MA, Sharp TM, Henry R, Brady OJ, et al. Evidence-based risk  
5 assessment and communication: a new global dengue-risk map for travellers and clinicians. *J*  
6 *Travel Med.* 2016;23.
- 7 3. Brady OJ, Gething PW, Bhatt S, Messina JP, Brownstein JS, Hoen AG, et al. Refining the Global  
8 Spatial Limits of Dengue Virus Transmission by Evidence-Based Consensus. Reithinger R, editor.  
9 *PLoS Negl Trop Dis.* 2012;6: e1760. doi:10.1371/journal.pntd.0001760
- 10 4. Dengue cases. Pan American Health Organization / World Health Organization.  
11 [http://www.paho.org/data/index.php/en/mnu-topics/communicable/indicadores-dengue-](http://www.paho.org/data/index.php/en/mnu-topics/communicable/indicadores-dengue-en/dengue-nacional-en/252-dengue-pais-ano-en.html)  
12 [en/dengue-nacional-en/252-dengue-pais-ano-en.html](http://www.paho.org/data/index.php/en/mnu-topics/communicable/indicadores-dengue-en/dengue-nacional-en/252-dengue-pais-ano-en.html)
- 13 5. Espinosa MO, Polop F, Rotela CH, Abril M, Scavuzzo CM. Spatial pattern evolution of *Aedes aegypti*  
14 breeding sites in an Argentinean city without a dengue vector control programme. *Geospatial*  
15 *Health.* 2016;11.
- 16 6. Espinosa M, Weinberg D, Rotela CH, Polop F, Abril M, Scavuzzo CM. Temporal dynamics and spatial  
17 patterns of *f* breeding sites, in the context of a dengue control program in Tartagal (Salta province,  
18 Argentina). *PLoS Negl Trop Dis.* 2016;10: e0004621.
- 19 7. Zika Cumulative Cases. Pan American Health Organization / World Health Organization. 1 Sep 2016  
20 [http://www.paho.org/hq/index.php?option=com\\_content&view=article&id=12390&Itemid=42090](http://www.paho.org/hq/index.php?option=com_content&view=article&id=12390&Itemid=42090)  
21 [&lang=en](http://www.paho.org/hq/index.php?option=com_content&view=article&id=12390&Itemid=42090)
- 22 8. Number of Reported Cases of Chikungunya Fever in the Americas, by Country or Territory. Pan  
23 American Health Organization / World Health Organization.  
24 [http://www.paho.org/hq/index.php?option=com\\_topics&view=readall&cid=5927&Itemid=40931](http://www.paho.org/hq/index.php?option=com_topics&view=readall&cid=5927&Itemid=40931)  
25 [&lang=en](http://www.paho.org/hq/index.php?option=com_topics&view=readall&cid=5927&Itemid=40931)
- 26 9. Che Dom N, Faiz Madzlan M, Nadira Yusoff SN, Hassan Ahmad A, Ismail R, Nazrina Camalxaman S.  
27 Profile distribution of juvenile *Aedes species* in an urban area of Malaysia. *Trans R Soc Trop Med*  
28 *Hyg.* 2016;110: 237–245.
- 29 10. Khan J, Khan I, Amin I. A comprehensive entomological, serological and molecular study of 2013  
30 dengue outbreak of Swat, Khyber Pakhtunkhwa, Pakistan. *PloS One.* 2016;11: e0147416.
- 31 11. Mboera LE, Mweya CN, Rumisha SF, Tungu PK, Makange MR, Misinzo G, et al. The risk of dengue  
32 virus transmission in Dar es Salaam, Tanzania during an epidemic period of 2014. *PLoS Negl Trop*  
33 *Dis.* 2016;10: e0004313.
- 34 12. Dhar-Chowdhury P, Haque CE, Lindsay R, Hossain S. Socioeconomic and ecological factors  
35 influencing *Aedes aegypti* prevalence, abundance, and distribution in Dhaka, Bangladesh. *Am J*  
36 *Trop Med Hyg.* 2016;94: 1223–1233.

## Household-level social-ecological risk factors for dengue infection in Ecuador

- 1 13. Global Strategy for dengue prevention and control, 2012–2020. World Health Organization.  
2 <http://www.who.int/denguecontrol/9789241504034/en/>
- 3 14. Gubler DJ, Clark GG. Community involvement in the control of *Aedes aegypti*. *Acta Trop.* 1996;61:  
4 169–179.
- 5 15. Bowman LR, Donegan S, McCall PJ. Is dengue vector control deficient in effectiveness or evidence?:  
6 Systematic review and meta-analysis. *PLoS Negl Trop Dis.* 2016;10: e0004551.
- 7 16. Paredes-Esquivel C, Lenhart A, del Río R, Leza MM, Estrugo M, Chalco E, et al. The impact of indoor  
8 residual spraying of deltamethrin on dengue vector populations in the Peruvian Amazon. *Acta*  
9 *Trop.* 2016;154: 139–144.
- 10 17. Vazquez-Prokopec GM, Kitron U, Montgomery B, Horne P, Ritchie SA. Quantifying the Spatial  
11 Dimension of Dengue Virus Epidemic Spread within a Tropical Urban Environment. *PLoS Negl Trop*  
12 *Dis.* 2010;4: e920. doi:10.1371/journal.pntd.0000920
- 13 18. Barrera R, Amador M, Acevedo V, Caban B, Felix G, Mackay AJ. Use of the CDC Autocidal Gravid  
14 Ovitrap to Control and Prevent Outbreaks of *Aedes aegypti* (Diptera: Culicidae). *J Med Entomol.*  
15 2014;51: 145–154.
- 16 19. Maoz D, Ward T, Samuel M, Müller P, Runge-Ranzinger S, Toledo J, et al. Community effectiveness  
17 of pyriproxyfen as a dengue vector control method: A systematic review. *PLoS Negl Trop Dis.*  
18 2017;11: e0005651. doi:10.1371/journal.pntd.0005651
- 19 20. Jiggins FM. The spread of Wolbachia through mosquito populations. *PLOS Biol.* 2017;15: e2002780.  
20 doi:10.1371/journal.pbio.2002780
- 21 21. Alphey L, Benedict M, Bellini R, Clark GG, Dame DA, Service MW, et al. Sterile-Insect Methods for  
22 Control of Mosquito-Borne Diseases: An Analysis. *Vector-Borne Zoonotic Dis.* 2009;10: 295–311.  
23 doi:10.1089/vbz.2009.0014
- 24 22. Suarez MR, Olarte SM, Ana MF, Gonzalez UC, others. Is what I have just a cold or is it dengue?  
25 Addressing the gap between the politics of dengue control and daily life in Villavicencio-Colombia.  
26 *Soc Sci Med* 1982. 2005;61: 495.
- 27 23. Winch P, Lloyd L, Godas MD, Kendall C. Beliefs about the prevention of dengue and other febrile  
28 illnesses in Mérida, Mexico. *J Trop Med Hyg.* 1991;94: 377–387.
- 29 24. Kendall C, Hudelson P, Leontsini E, Winch P, Lloyd L, Cruz F. Urbanization, dengue, and the health  
30 transition: anthropological contributions to international health. *Med Anthropol Q.* 1991;5: 257–  
31 268.
- 32 25. Stewart Ibarra AM, Luzadis VA, Borbor-Cordova M, Silva M, Ordonez T, Beltran Ayala, Efrain, et al.  
33 A social-ecological analysis of community perceptions of dengue fever and *Aedes aegypti* in  
34 Machala, Ecuador. *BMC Public Health.* 2014;14:1135.

## Household-level social-ecological risk factors for dengue infection in Ecuador

- 1 26. Al-Dubai SAR, Ganasegeran K, Alwan MR, Alshagga MA, Saif-Ali R. Factors affecting dengue fever  
2 knowledge, attitudes and practices among selected urban, semi-urban and rural communities in  
3 Malaysia. *Southeast Asian J Trop Med Public Health*. 2013;44: 37.
- 4 27. Chanyasanha C, Guruge GR, Sujirarat D. Factors influencing preventive behaviors for dengue  
5 infection among housewives in colombo, sri lanka. *Asia Pac J Public Health*. 2015;27: 96–104.
- 6 28. Dhimal M, Aryal KK, Dhimal ML, Gautam I, Singh SP, Bhusal CL, et al. Knowledge, attitude and  
7 practice regarding dengue fever among the healthy population of highland and lowland  
8 communities in central Nepal. *PLoS One*. 2014;9: e102028.
- 9 29. Naing C, Ren WY, Man CY, Fern KP, Qiqi C, Ning CN, et al. Awareness of dengue and practice of  
10 dengue control among the semi-urban community: a cross sectional survey. *J Community Health*.  
11 2011;36: 1044–1049.
- 12 30. Saied KG, Al-Taïar A, Altaïre A, Alqadsi A, Alariqi EF, Hassaan M. Knowledge, attitude and  
13 preventive practices regarding dengue fever in rural areas of Yemen. *Int Health*. 2015;7: 420–425.
- 14 31. Siddiqui TR, Ghazal S, Bibi S, Ahmed W, Sajjad SF. Use of the health belief model for the  
15 assessment of public knowledge and household preventive practices in Karachi, Pakistan, a  
16 dengue-endemic city. *PLoS Negl Trop Dis*. 2016;10: e0005129.
- 17 32. Alves AC, Fabbro AL dal, Passos ADC, Carneiro AFTM, Jorge TM, Martinez EZ. Knowledge and  
18 practices related to dengue and its vector: a community-based study from Southeast Brazil. *Rev  
19 Soc Bras Med Trop*. 2016;49: 222–226.
- 20 33. García-Betancourt T, Higuera-Mendieta DR, González-Uribe C, Cortés S, Quintero J. Understanding  
21 water storage practices of urban residents of an endemic dengue area in Colombia: Perceptions,  
22 rationale and socio-demographic characteristics. *PLoS One*. 2015;10: e0129054.
- 23 34. Paz-Soldan VA, Bauer K, Morrison AC, Lopez JJC, Izumi K, Scott TW, et al. Factors associated with  
24 correct and consistent insecticide treated curtain use in Iquitos, Peru. *PLoS Negl Trop Dis*. 2016;10:  
25 e0004409.
- 26 35. Paz-Soldán VA, Morrison AC, Lopez JJC, Lenhart A, Scott TW, Elder JP, et al. Dengue knowledge and  
27 preventive practices in Iquitos, Peru. *Am J Trop Med Hyg*. 2015;93: 1330–1337.
- 28 36. Syed M, Saleem T, Syeda U-R, Habib M, Zahid R, Bashir A, et al. Knowledge, attitudes and practices  
29 regarding dengue fever among adults of high and low socioeconomic groups. *J Pak Med Assoc*.  
30 2010;60: 243.
- 31 37. Wong LP, Shakir SMM, Atefi N, AbuBakar S. Factors affecting dengue prevention practices:  
32 nationwide survey of the Malaysian public. *PLoS One*. 2015;10: e0122890.
- 33 38. Chandren JR, Wong LP, AbuBakar S. Practices of dengue fever prevention and the associated  
34 factors among the Orang Asli in Peninsular Malaysia. *PLoS Negl Trop Dis*. 2015;9: e0003954.



## Household-level social-ecological risk factors for dengue infection in Ecuador

- 1 39. Arellano C, Castro L, Díaz-Caravantes RE, Ernst KC, Hayden M, Reyes-Castro P. Knowledge and  
2 beliefs about dengue transmission and their relationship with prevention practices in Hermosillo,  
3 Sonora. *Front Public Health*. 2015;3.
- 4 40. Sayavong C, Chompikul J, Wongsawass S, Rattanapan C. Knowledge, attitudes and preventive  
5 behaviors related to dengue vector breeding control measures among adults in communities of  
6 Vientiane, capital of the Lao PDR. *J Infect Public Health*. 2015;8: 466–473.
- 7 41. Stewart Ibarra AM, Ryan SJ, Beltrán E, Mejía R, Silva M, Muñoz Á. Dengue Vector Dynamics (*Aedes*  
8 *aegypti*) Influenced by Climate and Social Factors in Ecuador: Implications for Targeted Control.  
9 *PLOS ONE*. 2013;8: e78263.
- 10 42. Stewart Ibarra AM, Munoz AG, Ryan SJ, Borbor MJ, Ayala EB, Finkelstein JL, et al. Spatiotemporal  
11 clustering, climate periodicity, and social-ecological risk factors for dengue during an outbreak in  
12 Machala, Ecuador, in 2010. *BMC Infect Dis*. 2014;14: 610. doi:10.1186/s12879-014-0610-4
- 13 43. Chen B, Yang J, Luo L, Yang Z, Liu Q. Who Is Vulnerable to Dengue Fever? A Community Survey of  
14 the 2014 Outbreak in Guangzhou, China. *Int J Environ Res Public Health*. 2016;13: 712.
- 15 44. Wong LP, AbuBakar S, Chinna K. Community knowledge, health beliefs, practices and experiences  
16 related to dengue fever and its association with IgG seropositivity. *PLoS Negl Trop Dis*. 2014;8:  
17 e2789.
- 18 45. Demanou M, Pouillot R, Grandadam M, Boisier P, Kamgang B, Hervé JP, et al. Evidence of dengue  
19 virus transmission and factors associated with the presence of anti-dengue virus antibodies in  
20 humans in three major towns in Cameroon. *PLoS Negl Trop Dis*. 2014;8: e2950.
- 21 46. Garg S, Chakravarti A, Singh R, Masthi NR, Goyal RC, Jammy GR, et al. Dengue serotype-specific  
22 seroprevalence among 5-to 10-year-old children in India: a community-based cross-sectional  
23 study. *Int J Infect Dis*. 2017;54: 25–30.
- 24 47. Ramos MM, Mohammed H, Zielinski-Gutierrez E, Hayden MH, Lopez JLR, Fournier M, et al.  
25 Epidemic Dengue and Dengue Hemorrhagic Fever at the Texas–Mexico Border: Results of a  
26 Household-based Seroepidemiologic Survey, December 2005. *Am J Trop Med Hyg*. 2008;78: 364–  
27 369.
- 28 48. Soghaier MA, Himatt S, Osman KE, Okoued SI, Seidahmed OE, Beatty ME, et al. Cross-sectional  
29 community-based study of the socio-demographic factors associated with the prevalence of  
30 dengue in the eastern part of Sudan in 2011. *BMC Public Health*. 2015;15: 558.
- 31 49. Messenger AM, Barr KL, Weppelmann TA, Barnes AN, Anderson BD, Okech BA, et al. Serological  
32 evidence of ongoing transmission of dengue virus in permanent residents of Key West, Florida.  
33 *Vector-Borne Zoonotic Dis*. 2014;14: 783–787.
- 34 50. Stewart-Ibarra AM, Kenneson A, King CA, Abbott M, Barbachano-Guerrero A, Beltran-Ayala E, et al.  
35 The burden of dengue and chikungunya in southern coastal Ecuador: Epidemiology, clinical  
36 presentation, and phylogenetics from a prospective study in Machala in 2014 and 2015. *bioRxiv*.  
37 2017; 102004.

## Household-level social-ecological risk factors for dengue infection in Ecuador

- 1 51. Yoon I-K, Getis A, Aldstadt J, Rothman AL, Tannitisupawong D, Koenraadt CJM, et al. Fine Scale  
2 Spatiotemporal Clustering of Dengue Virus Transmission in Children and *Aedes aegypti* in Rural  
3 Thai Villages. PLoS Negl Trop Dis. 2012;6: e1730.
- 4 52. Thomas SJ, Aldstadt J, Jarman RG, Buddhari D, Yoon I-K, Richardson JH, et al. Improving dengue  
5 virus capture rates in humans and vectors in Kamphaeng Phet Province, Thailand, using an  
6 enhanced spatiotemporal surveillance strategy. Am J Trop Med Hyg. 2015;93: 24–32.
- 7 53. Manrique-Saide P, Davies CR, Coleman PG, Che-Mendoza A, Dzul-Manzanilla F, Barrera-Pérez M, et  
8 al. The risk of *Aedes aegypti* breeding and premises condition in south Mexico. J Am Mosq Control  
9 Assoc. 2013;29: 337–345.
- 10 54. Samuel M, Maoz D, Manrique P, Ward T, Runge-Ranzinger S, Toledo J, et al. Community  
11 effectiveness of indoor spraying as a dengue vector control method: A systematic review. PLoS  
12 Negl Trop Dis. 2017;11: e0005837.
- 13 55. Heydari N, Larsen DA, Neira M, Beltrán Ayala E, Fernandez P, Adrian J, et al. Household Dengue  
14 Prevention Interventions, Expenditures, and Barriers to *Aedes aegypti* Control in Machala,  
15 Ecuador. Int J Environ Res Public Health. 2017;14: 196.
- 16 56. Vontas J, Kioulos E, Pavlidi N, Morou E, Della Torre A, Ranson H. Insecticide resistance in the major  
17 dengue vectors *Aedes albopictus* and *Aedes aegypti*. Pestic Biochem Physiol. 2012;104: 126–131.
- 18 57. Vanwambeke S, van Benthem B, Khantikul N, Burghoorn-Maas C, Panart K, Oskam L, et al. Multi-  
19 level analyses of spatial and temporal determinants for dengue infection. Int J Health Geogr.  
20 2006;5: 5.
- 21 58. Lenhart A, Orelus N, Maskill R, Alexander N, Streit T, McCall PJ. Insecticide-treated bednets to  
22 control dengue vectors: preliminary evidence from a controlled trial in Haiti. Trop Med Int Health  
23 TM IH. 2008;13: 56–67.
- 24 59. Tsuzuki A, Thiem VD, Suzuki M, Yanai H, Matsubayashi T, Yoshida L-M, et al. Can daytime use of  
25 bed nets not treated with insecticide reduce the risk of dengue hemorrhagic fever among children  
26 in Vietnam? Am J Trop Med Hyg. 2010;82: 1157–1159.
- 27 60. Loroño-Pino MA, García-Rejón JE, Machain-Williams C, Gomez-Carro S, Nuñez-Ayala G, del Rosario  
28 Nájera-Vázquez M, et al. Towards a Casa Segura: a consumer product study of the effect of  
29 insecticide-treated curtains on *Aedes aegypti* and dengue virus infections in the home. Am J Trop  
30 Med Hyg. 2013;89: 385–397.
- 31 61. Trpis M, McClelland GAH, Gillett JD, Teesdale C, Rao TR. Diel periodicity in the landing of *Aedes*  
32 *aegypti* on man. Bull World Health Organ. 1973;48: 623.
- 33 62. Dengue Control strategies. World Health Organization.  
34 [http://www.who.int/denguecontrol/control\\_strategies/en/](http://www.who.int/denguecontrol/control_strategies/en/)
- 35 63. Handel AS, Ayala EB, Borbor-Cordova MJ, Fessler AG, Finkelstein JL, Espinoza RXR, et al.  
36 Knowledge, attitudes, and practices regarding dengue infection among public sector healthcare  
37 providers in Machala, Ecuador. Trop Dis Travel Med Vaccines. 2016;2: 8.

## Household-level social-ecological risk factors for dengue infection in Ecuador

- 1 64. Ong DQ, Sitaram N, Rajakulendran M, Koh GC, Seow AL, Ong ES, et al. Knowledge and practice of  
2 household mosquito breeding control measures between a dengue hotspot and non-hotspot in  
3 Singapore. *Ann Acad Med Singap*. 2010;39: 146.
- 4 65. Stone L, Campbell J. The use and misuse of surveys in international development: an experiment  
5 from Nepal. *Hum Organ*. 1984;43: 27–37.
- 6 66. Tun-Lin W, Lenhart A, Nam VS, Rebollar-Téllez E, Morrison AC, Barbazan P, et al. Reducing costs  
7 and operational constraints of dengue vector control by targeting productive breeding places: a  
8 multi-country non-inferiority cluster randomized trial. *Trop Med Int Health*. 2009;14: 1143–1153.
- 9 67. Tun-Lin W, Kay BH, Barnes A. The Premise Condition Index: A Tool for Streamlining Surveys of  
10 *Aedes aegypti*. *Am J Trop Med Hyg*. 1995;53: 591–594.
- 11 68. Manderson L, Aaby P. Can rapid anthropological procedures be applied to tropical diseases?  
12 *Health Policy Plan*. 1992;7: 46–55.
- 13 69. Manderson L, Aaby P. An epidemic in the field? Rapid assessment procedures and health research.  
14 *Soc Sci Med*. 1992;35: 839–850.
- 15 70. Nading AM. Local biologies, leaky things, and the chemical infrastructure of global health. *Med  
16 Anthropol*. 2017;36: 141–156.
- 17 71. Mitchell-Foster K. Interdisciplinary knowledge translation and evaluation strategies for  
18 participatory dengue prevention in Machala, Ecuador. Thesis for a Doctor of Philosophy, University  
19 of British Columbia. 2013. Available:  
20 [http://elk.library.ubc.ca/bitstream/handle/2429/45297/ubc\\_2013\\_fall\\_mitchellfoster\\_kendra.pdf?  
21 sequence=6](http://elk.library.ubc.ca/bitstream/handle/2429/45297/ubc_2013_fall_mitchellfoster_kendra.pdf?sequence=6)

22

## Household-level social-ecological risk factors for dengue infection in Ecuador

- 1 **Supporting Information Legends**
- 2 Supporting Text 1: Household survey instrument in English
- 3 Supporting Text 2: Household survey instrument in Spanish
- 4

## Household-level social-ecological risk factors for dengue infection in Ecuador

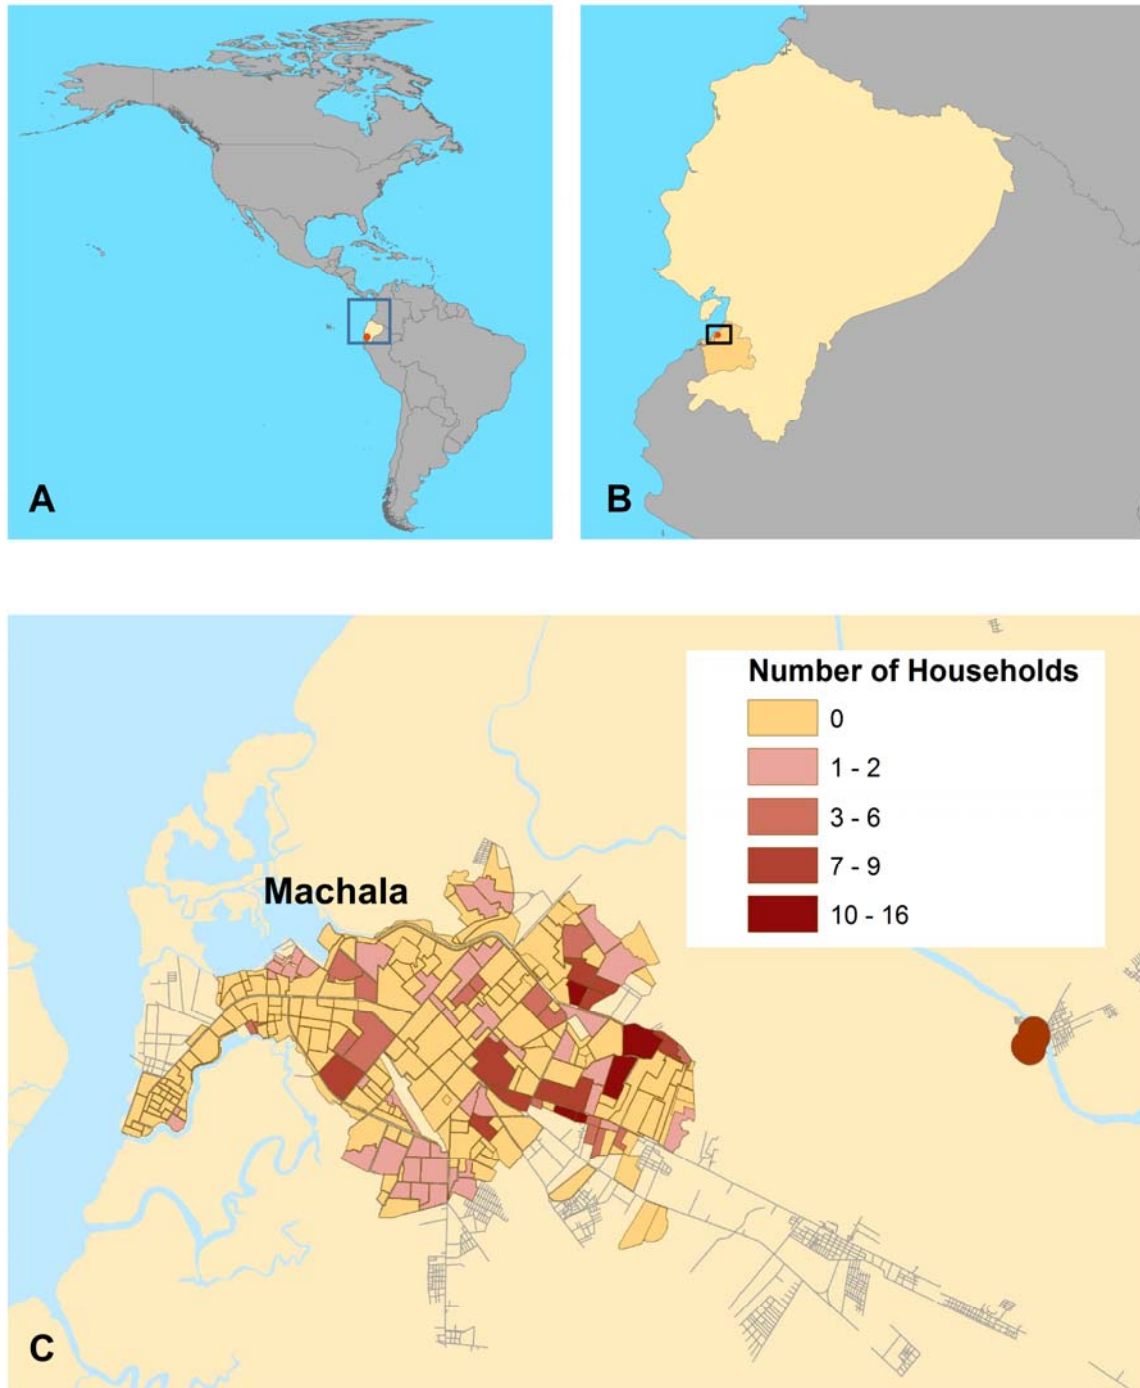

1

2 **Figure 1.** A map of the study site and distribution of study households. (A) location of Ecuador in the  
3 Americas (B) location of the city of Machala, El Oro Province, Ecuador (C) the distribution of households  
4 surveyed in this study. Household locations were aggregated to the neighborhood level for de-  
5 identification. Some clusters (5 households) have been disaggregated across block boundaries. This figure  
6 was created in ArcGIS version 10.3.1 (ESRI, 2016) using shapefiles from the GADM database of Global

## Household-level social-ecological risk factors for dengue infection in Ecuador

- 1 Administrative Areas, version 2.8, freely available at [gadm.org](http://gadm.org). Streets are derived from data available at
- 2 the OpenStreetMap project ([openstreetmap.org](http://openstreetmap.org)) for the municipality of Machala, El Oro, Ecuador.
- 3 Neighborhood polygons were manually digitized by AMS, and the shapefile data are available upon
- 4 request to the authors.

5

Household-level social-ecological risk factors for dengue infection in Ecuador

1 Table 1: Social-ecological factors in households with versus without acute or recent dengue  
2 infections.

|                                          | All households<br>N=219 | Households<br>without dengue<br>N=80 | Households with<br>dengue<br>N=139 | p-<br>value   |
|------------------------------------------|-------------------------|--------------------------------------|------------------------------------|---------------|
| <b>Head of Household Characteristics</b> |                         |                                      |                                    |               |
| Age - mean (SD)                          | 47.8 (13.6)             | 50.3 (14.7)                          | 46.3 (12.8)                        | <b>0.0403</b> |
| Sex – female                             | 53/219 (24.2%)          | 36/80 (32.5%)                        | 27/139 (19.4%)                     | <b>0.0296</b> |
| Education – secondary or more            | 128/215 (59.5%)         | 47/78 (60.3%)                        | 81/137 (59.1%)                     | 0.8708        |
| Employed                                 | 182/219 (83.1%)         | 59/80 (73.8%)                        | 123/139 (88.5%)                    | <b>0.0051</b> |
| If employed, make more than minimum wage | 74/165 (44.9%)          | 24/52 (46.2%)                        | 50/113 (44.2%)                     | 0.8231        |
| If employed, employment is stable        | 132/12 (72.5%)          | 43/59 (72.9%)                        | 89/123 (72.4%)                     | 0.9410        |
| <b>Household Characteristics</b>         |                         |                                      |                                    |               |
| # People in household - mean (SD)        | 4.57 (1.90)             | 4.29 (1.86)                          | 4.73 (1.91)                        | 0.0999        |
| # bedrooms - mean (SD)                   | 2.53 (1.06)             | 2.49 (1.10)                          | 2.55 (1.04)                        | 0.6726        |
| #People per bedroom - mean (SD)          | 2.12 (1.32)             | 2.02 (1.32)                          | 2.18 (1.32)                        | 0.3926        |
| # families on property – mean (SD)       | 1.40 (0.88)             | 1.40 (1.04)                          | 1.40 (0.78)                        | 0.9815        |
| Rented                                   | 38/219 (17.4%)          | 11/80 (13.8%)                        | 27/139 (19.4%)                     | 0.2856        |
| Other renters on property                | 23/219 (10.5%)          | 10/80 (12.5%)                        | 13/139 (9.35%)                     | 0.4644        |
| Condition of patio                       |                         |                                      |                                    |               |
| No patio                                 | 44/218 (20.2%)          | 16/80 (20.0%)                        | 28/138 (20.3%)                     |               |
| Disorganized                             | 34/218 (15.6%)          | 9/80 (11.2%)                         | 25/138 (18.1%)                     |               |
| Average                                  | 106/218 (48.6%)         | 41/80 (51.2%)                        | 65/138 (47.1%)                     |               |
| Very organized/clean                     | 34/218 (15.6%)          | 14/80 (17.5%)                        | 20/138 (14.5%)                     | 0.5712        |
| Shade on patio                           |                         |                                      |                                    |               |
| No patio                                 | 44/218 (20.2%)          | 16/80 (20.0%)                        | 28/138 (20.3%)                     |               |
| Sunny (<25% shade)                       | 50/218 (40.8%)          | 39/80 (48.8%)                        | 50/138 (36.2%)                     |               |
| Partial (25-50% shade)                   | 35/218 (26.2%)          | 32/80 (27.5%)                        | 35/138 (25.4%)                     |               |
| Shaded (>50% shade)                      | 25/218 (12.8%)          | 3/80 (3.75%)                         | 25/138 (18.1%)                     | <b>0.0172</b> |
| Screens on all windows                   | 63/219 (28.8%)          | 22/80 (27.5%)                        | 41/139 (29.5%)                     | 0.7533        |
| Screens have no holes                    | 58/98 (51.0%)           | 22/37 (59.5%)                        | 28/61 (45.9%)                      | 0.1931        |
| Standing water present                   | 94/217 (43.3%)          | 35/79 (44.3%)                        | 59/138 (42.8%)                     | 0.8245        |
| Standing water in trash bins             | 30/219 (13.7%)          | 10/80 (12.5%)                        | 30/139 (14.4%)                     | 0.6955        |
| Standing water in 55 gallon drums        | 49/219 (21.4%)          | 17/80 (21.2%)                        | 32/139 (23.0%)                     | 0.7620        |
| Standing water in puddles                | 33/219 (15.1%)          | 11/80 (13.8%)                        | 22/139 (15.8%)                     | 0.6790        |
| Standing water in tires                  | 9/219 (4.11%)           | 4/80 (5.00%)                         | 5/139 (3.60%)                      | 0.7271        |
| Abandoned property nearby                | 69/217 (31.8%)          | 18/79 (22.8%)                        | 51/138 (37.0%)                     | <b>0.0310</b> |
| <b>Services</b>                          |                         |                                      |                                    |               |

## Household-level social-ecological risk factors for dengue infection in Ecuador

|                          |                 |               |                 |               |
|--------------------------|-----------------|---------------|-----------------|---------------|
| Piped water inside house | 166/219 (75.8%) | 68/80 (85.0%) | 98/139 (70.5%)  | <b>0.0159</b> |
| Always running water     | 110/218 (50.5%) | 36/80 (45.0%) | 74/138 (53.6%)  | 0.2197        |
| Air conditioning         | 23/219 (10.5%)  | 10/80 (12.5%) | 13/139 (9.35%)  | 0.4644        |
| Cistern or elevated tank | 160/219 (73.1%) | 60/80 (75.0%) | 100/139 (72.0%) | 0.6234        |
| Other water storage      | 95/219 (43.4%)  | 36/80 (45.0%) | 59 /139 (42.4%) | 0.7135        |
| Sewage services          | 187/219 (85.4%) | 72/80 (90.0%) | 115/139 (82.7%) | 0.1427        |
| Trash picked up daily    | 54/219 (24.6%)  | 26/80 (32.5%) | 28/139 (20.0%)  | <b>0.0411</b> |

1

2



Household-level social-ecological risk factors for dengue infection in Ecuador

1 Table 2. KAPs in households with versus without acute or recent dengue infections.

|                                                                         | All households<br>N=219 | Households<br>without dengue<br>N=80 | Households with<br>dengue<br>N=139 | p-value           |
|-------------------------------------------------------------------------|-------------------------|--------------------------------------|------------------------------------|-------------------|
| <b>Knowledge and Attitudes</b>                                          |                         |                                      |                                    |                   |
| Considers dengue to be a serious problem in the community.              | 196/218 (89.9%)         | 69/80 (86.2%)                        | 127/138 (92.0%)                    | 0.1722            |
| Believes dengue is a severe disease.                                    | 197/219 (89.9%)         | 69/80 (86.2%)                        | 128/139 (92.1%)                    | 0.1665            |
| Believes dengue prevention in the household is difficult or impossible. | 53/218 (24.3%)          | 23/79 (29.1%)                        | 30/139 (21.6%)                     | 0.2127            |
| Knows that dengue is transmitted by mosquitoes.                         | 197/218 (90.8%)         | 70/80 (87.5%)                        | 127/137 (92.7%)                    | 0.2013            |
| Knows breeding location of mosquitoes.                                  | 212/218 (96.8%)         | 79/80 (98.8%)                        | 133/139 (95.7%)                    | 0.2141            |
| Believes that lack of information is a barrier to prevention            | 39/219 (17.8%)          | 10/80 (12.5%)                        | 29/139 (20.9%)                     | 0.1193            |
| Believes that cost is a barrier to prevention                           | 15/219 (6.85%)          | 6/80 (7.50%)                         | 9/139 (6.47%)                      | 0.7724            |
| Believes that lack of time is a barrier to prevention                   | 20/219 (9.13%)          | 7/80 (8.75%)                         | 13/139 (9.35%)                     | 0.8815            |
| Believes that too many mosquitoes is a barrier to prevention            | 39/219 (17.8%)          | 13/80 (16.2%)                        | 26/139 (18.7%)                     | 0.6475            |
| Reports no barriers to prevention                                       | 119/219 (54.3%)         | 48/80 (60.0%)                        | 71/139 (51.1%)                     | 0.2019            |
| <b>Prevention Actions Taken</b>                                         |                         |                                      |                                    |                   |
| Screens on windows/doors                                                | 22/219 (10.0%)          | 7/80 (8.75%)                         | 15/139 (10.8%)                     | 0.6285            |
| Apply repellent                                                         | 22/219 (10.0%)          | 10/80 (8.63%)                        | 12/139 (12.5%)                     | 0.3593            |
| Clean garbage                                                           | 81/219 (37.0%)          | 28/80 (35.0%)                        | 53/139 (38.1%)                     | 0.6441            |
| Burn palosanto                                                          | 11/219 (5.02%)          | 6/80 (7.50%)                         | 5/139 (3.60%)                      | 0.2029            |
| Cover water containers                                                  | 83/219 (37.9%)          | 24/80 (30.0%)                        | 59/139 (42.4%)                     | 0.0675            |
| Shut windows/doors                                                      | 21/219 (9.59%)          | 9/80 (11.2%)                         | 12/139 (8.63%)                     | 0.5265            |
| Cut vegetation                                                          | 3/219 (1.37%)           | 0/80 (0%)                            | 3/139 (2.16%)                      | 0.1858            |
| Apply chemicals to standing water                                       | 56/219 (25.6%)          | 13/80 (16.2%)                        | 43/139 (30.9%)                     | <b>0.0165</b>     |
| Eliminate standing water                                                | 83/219 (37.9%)          | 25/80 (31.2%)                        | 58/139 (41.7%)                     | 0.1238            |
| Pour diesel on the floors/puddles                                       | 2/219 (0.91%)           | 1/80 (1.25%)                         | 1/139 (0.72%)                      | 0.6910            |
| Fumigate in my house                                                    | 83/219 (37.9%)          | 45/80 (56.2%)                        | 38/139 (27.3%)                     | <b>&lt;0.0001</b> |
| Use mosquito bed net                                                    | 45/219 (20.6%)          | 21/80 (26.2%)                        | 24/139 (17.3%)                     | 0.1131            |

2

Household-level social-ecological risk factors for dengue infection in Ecuador

- 1 Table 3. Multivariate logistic regression model of predictors of acute or recent dengue infections
- 2 in the household.

| <b>Analysis of Maximum Likelihood Estimates</b>       |           |                 |           |                        |                      |                          |
|-------------------------------------------------------|-----------|-----------------|-----------|------------------------|----------------------|--------------------------|
| <b>Parameter</b>                                      | <b>DF</b> | <b>Estimate</b> | <b>SE</b> | <b>Wald Chi-Square</b> | <b>Pr &gt; ChiSq</b> | <b>OR (95%CI)</b>        |
| <b>Model 1: Main Effects</b>                          |           |                 |           |                        |                      |                          |
| Intercept                                             | 1         | -1.5256         | 0.5209    | 8.5780                 | 0.0034               |                          |
| Abandoned property nearby                             | 1         | 0.5292          | 0.2386    | 4.9191                 | 0.0266               | 2.882<br>(1.131-7.342)   |
| Frequent interruptions in water supply                | 1         | 0.4542          | 0.2110    | 4.6341                 | 0.0313               | 2.480<br>(1.085-5.672)   |
| Piped water inside the house                          | 1         | -0.9461         | 0.2912    | 10.5543                | 0.0012               | 0.151<br>(0.048-0.472)   |
| Patio with >50% shade                                 | 1         | 1.3929          | 0.4318    | 10.4046                | 0.0013               | 16.213<br>(2.983-88.108) |
| Fumigation inside house                               | 1         | -0.7358         | 0.2102    | 12.2566                | 0.0005               | 0.230<br>(0.101-0.523)   |
| Use mosquito bed nets                                 | 1         | -0.5192         | 0.2540    | 4.1790                 | 0.0409               | 0.354<br>(0.131-0.958)   |
| Cost is a barrier                                     | 1         | -0.8624         | 0.4392    | 3.8565                 | 0.0496               | 0.178<br>(0.032-0.997)   |
| <b>Model 2: Main Effects and Two-way Interactions</b> |           |                 |           |                        |                      |                          |
| Intercept                                             | 1         | 1.2075          | 0.4201    | 8.2636                 | 0.004                |                          |
| Abandoned property nearby                             | 1         | 0.3443          | 0.4495    | 0.5868                 | 0.4437               |                          |
| Piped water inside house                              | 1         | -0.2848         | 0.4643    | 0.3763                 | 0.5396               |                          |
| Patio with >50% shade                                 | 1         | 2.5854          | 0.7196    | 12.9066                | 0.0003               | 13.268<br>(3.238-54.373) |
| Fumigation inside house                               | 1         | 0.3292          | 0.9075    | 0.1316                 | 0.7168               |                          |
| Use mosquito bed nets                                 | 1         | -0.9427         | 0.4008    | 5.5337                 | 0.0187               | 0.390<br>(0.178-0.854)   |
| Abandoned property*fumigation                         | 1         | 1.4994          | 0.7442    | 4.0596                 | 0.0439               |                          |
| Piped water inside*fumigation                         | 1         | -2.5311         | 0.9907    | 6.5277                 | 0.0106               |                          |

3

4
